# Supplementary material for: The energetics of social signaling during roost location in Spix's disc-winged bats
Source: Oxford University Press journal article supplement (doi:10.1242/jeb.238279), 2021-07-06
Supplement: jeb238279supp.pdf [file jeb238279supp.pdf]

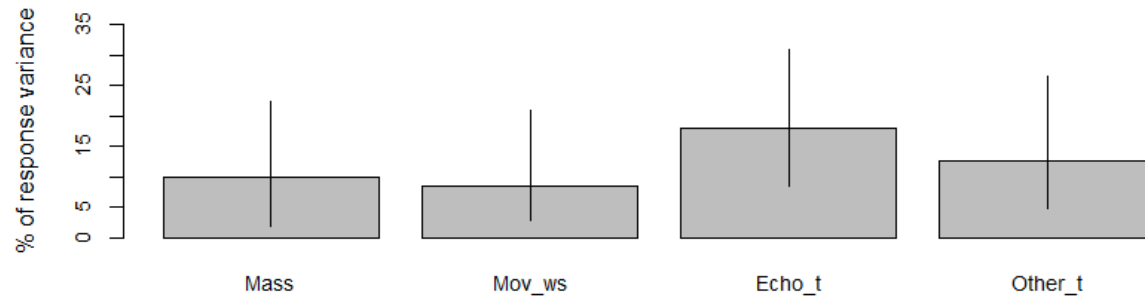

**Fig. S1.** Bar plots showing relative importance of regressors in the final model (Tables S3 and S4) based on the LMG metric, with 90% bootstrap confidence intervals.

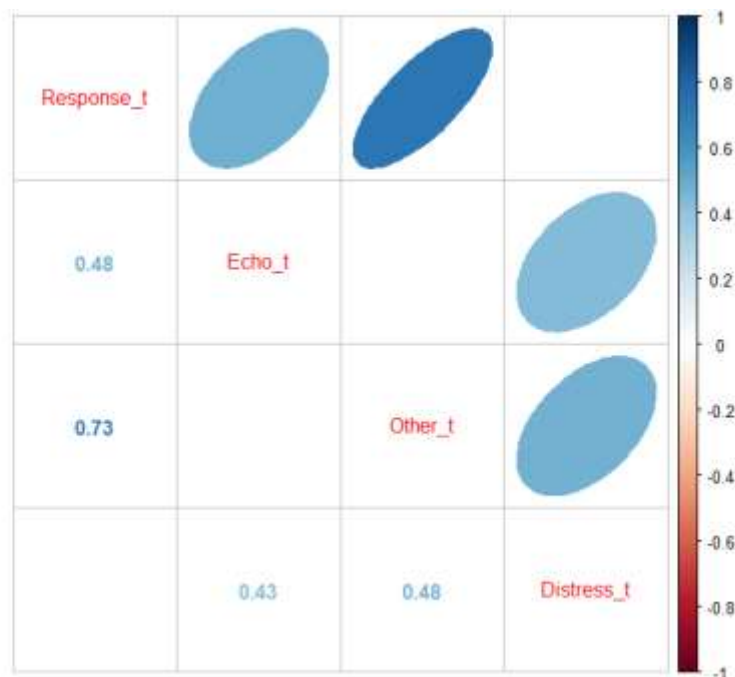

**Fig. S2.** Plot showing the results of Spearman's rank correlation coefficients for time spent producing various types of calls. Ellipses in the upper triangular matrix show the strength and slope of the coefficient. Coefficient values that are significant ( $> 0.01$ ) are added to the lower triangular matrix.

**Table S1.** Results of the linear models to test if there is a difference in energy expenditure by sex (with mass as covariate) in trials with sound and trials without sound.

| Trial         | Variable | Estimate | S.E.  | F-value | P     |
|---------------|----------|----------|-------|---------|-------|
| Without sound | Mass     | 2.24     | 0.99  | 8.84    | <0.01 |
|               | Sex      | 6.18     | 7.46  | 2.69    | 0.11  |
|               | Mass*Sex | -1.70    | 1.73  | 0.96    | 0.33  |
| With sound    | Mass     | 2.80     | 2.36  | 2.75    | 0.10  |
|               | Sex      | 1.76     | 17.73 | 0.67    | 0.67  |
|               | Mass*Sex | -0.57    | 4.12  | 0.89    | 0.89  |

**Table S2.** Results of the linear model to test if the difference in energy expenditure with and without sound is explained by sex and whether bats produce response calls or not (vocal), with mass as covariate. The interaction between factors was initially added to the model but was non-significant, thus was later removed.

| Variable | Estimate | S.E. | F- value | P       |
|----------|----------|------|----------|---------|
| Mass     | 3.53     | 1.86 | 0.20     | 0.65    |
| Sex      | 1.55     | 1.47 | 0.08     | 0.76    |
| Vocal    | 5.35     | 1.42 | 14.15    | < 0.001 |

**Table S3.** Models used to test how time spent in various activities, including moving and producing various types of calls while accounting for the individual's mass, influenced energy expenditure during trials with sound. For each model we present the AIC, and the difference in values when compared with the full model.

| Name of model                              | Model                                                   | AIC    | $\Delta$ AIC |
|--------------------------------------------|---------------------------------------------------------|--------|--------------|
| Full model                                 | EE ~ Mass + Move + Time vocal                           | 192.58 | 0            |
| Null model                                 | EE ~ 1                                                  | 203.91 | 11.33        |
| All calls except response                  | EE ~ Mass + Move + Time vocal-response                  | 192.49 | -0.09        |
| All calls except echolocation              | EE ~ Mass + Move + Time vocal-echolocation              | 194.10 | 1.52         |
| All calls except other                     | EE ~ Mass + Move + Time vocal-other                     | 192.71 | 0.13         |
| All calls except distress                  | EE ~ Mass + Move + Time vocal-distress                  | 192.31 | -0.27        |
| All calls except response and echolocation | EE ~ Mass + Move + Time vocal-response and echolocation | 195.30 | 2.72         |
| All calls except response and other        | EE ~ Mass + Move + Time vocal-response and other        | 193.28 | 0.7          |

|                                            |                                                         |        |       |
|--------------------------------------------|---------------------------------------------------------|--------|-------|
| All calls except response and distress     | EE ~ Mass + Move + Time vocal-response and distress     | 186.11 | -6.47 |
| All calls except echolocation and other    | EE ~ Mass + Move + Time vocal-echolocation and other    | 194.29 | 1.71  |
| All calls except echolocation and distress | EE ~ Mass + Move + Time vocal-echolocation and distress | 193.98 | 1.4   |
| All calls except other and distress        | EE ~ Mass + Move + Time vocal-other and distress        | 192.50 | -0.08 |
| Only response calls                        | EE ~ Mass + Move + Only response                        | 194.22 | 1.64  |
| Only echolocation calls                    | EE ~ Mass + Move + Only echolocation                    | 188.38 | -4.2  |
| Only other calls                           | EE ~ Mass + Move + Only other                           | 192.98 | 0.4   |
| Only distress calls                        | EE ~ Mass + Move + Only distress                        | 195.52 | 2.94  |
| Final model                                | EE ~ Mass + Move + Echolocation + Other                 | 188.05 | -4.53 |

**Table S4.** Results of the full and final linear models (see Table S3) to test how time spent in various activities, including moving and producing calls while accounting for the individual's mass, influenced energy expenditure during trials with sound.

| Model | Variable     | Estimate | S.E. | F- value | P       |
|-------|--------------|----------|------|----------|---------|
| Full  | Mass         | 4.05     | 1.47 | 4.12     | 0.05    |
|       | Move         | 0.56     | 0.34 | 13.00    | 0.001   |
|       | Time vocal   | 0.03     | 0.02 | 2.72     | 0.10    |
| Final | Mass         | 3.50     | 1.42 | 4.80     | 0.3     |
|       | Move         | 0.13     | 0.36 | 15.17    | < 0.001 |
|       | Echolocation | 0.21     | 0.08 | 7.26     | 0.01    |
|       | Other        | 0.26     | 0.18 | 2.06     | 0.16    |

**Table S5.** Results of the generalized linear model to test if time spent producing response calls was influenced by mass and RMR.

| Variable  | Estimate | S.E. | P    |
|-----------|----------|------|------|
| Sex       | 2.92     | 1.80 | 0.42 |
| RMR       | -0.06    | 0.18 | 0.14 |
| Sex*RMR   | -0.92    | 0.80 | 0.05 |
| Body mass | -0.34    | 0.80 | 0.95 |
